# Supplementary material for: Fe(ii)(aq)uptake of Mg(ii)–Al(iii)/Fe(iii)–SO4/CO3HTLCs under alkaline conditions: adsorption and solid state transformation mechanisms
Source: Royal Society of Chemistry journal article supplement (doi:10.1039/c4ra08802f), 2014-01-01
Supplement: c4ra08802f1.pdf [file c4ra08802f1.pdf]

Table S0. Initial composition of Mg(II)-Al(III)/Fe(III)-CO<sub>3</sub>/SO<sub>4</sub> solids (mg/L) used in abiotic reduction tests. Experimental ratio is the molar ratio of Mg/X, where X =Fe or Al.

| MgFeCO <sub>3</sub> |       |           | MgAlCO <sub>3</sub> |       |           | MgFeSO <sub>4</sub> |       |           | MgAlSO <sub>4</sub> |       |           |
|---------------------|-------|-----------|---------------------|-------|-----------|---------------------|-------|-----------|---------------------|-------|-----------|
| (Mg)                | (X)   | Exp Ratio |
| 24304               | 27923 | 0.87      | 24305               | 26982 | 0.91      | 24301               | 55845 | 0.44      | 24277               | 12378 | 1.96      |

Table S1. The average pH range, %Fe removed from solution, and %Mg released after 7 days for tests conducted at pH 8 for 7 days with 10 mM Fe(II)<sub>(aq)</sub>.

|                           | MgFeCO <sub>3</sub> | MgAlCO <sub>3</sub> | MgFeSO <sub>4</sub> | MgAlSO <sub>4</sub> |
|---------------------------|---------------------|---------------------|---------------------|---------------------|
| pH range measured         | 8.0-8.9             | 7.8-8.5             | 8.2-8.9             | 7.5-7.7             |
| % Fe removed              | 99                  | 99                  | 99                  | 81                  |
| %Mg released <sup>‡</sup> | 1.42                | 0.3                 | 1.36                | 0.2                 |

<sup>‡</sup> Mg released relative to the initial Mg solid concentration in Table S0.

Table S2. The average pH range, %Fe removed from solution, and %Mg released after 7 days for tests conducted at pH 8 with 0.5 mM Fe(II)<sub>(aq)</sub>.

|                           | MgFeCO <sub>3</sub> | MgAlCO <sub>3</sub> | MgFeSO <sub>4</sub> | MgAlSO <sub>4</sub> |
|---------------------------|---------------------|---------------------|---------------------|---------------------|
| pH range measured         | 9.0-9.1             | 9.7-9.7             | 9.0-9.5             | 9.0-9.2             |
| % Fe removed              | 99                  | 99                  | 99                  | 99                  |
| %Mg released <sup>‡</sup> | 0.21                | 0.01                | 0.44                | 0.02                |

<sup>‡</sup> Mg released relative to the initial Mg solid concentration in Table S0.

Table S3. The average pH range, %Fe removed from solution, and %Mg released after 7 days for tests conducted at pH 10 with 0.5 mM Fe(II)<sub>(aq)</sub>.

|                           | MgFeCO <sub>3</sub> | MgAlCO <sub>3</sub> | MgFeSO <sub>4</sub> | MgAlSO <sub>4</sub> |
|---------------------------|---------------------|---------------------|---------------------|---------------------|
| pH range measured         | 9.2-9.7             | 9.9-10.0            | 9.2-9.5             | 9.7-10.1            |
| % Fe removed              | 99                  | 99                  | 99                  | 99                  |
| %Mg released <sup>‡</sup> | 0.08                | 0.003               | 0.27                | 0.001               |

<sup>‡</sup> Mg released relative to the initial Mg solid concentration in Table S0.

Table S4. Leachability of Fe and Mg for individual tests conducted at pH 8 for 7 days with 10 mM Fe(II)<sub>(aq)</sub>. Time 0 days represents conditions before Mg(II)-Al(III)/Fe(III)-CO<sub>3</sub>/SO<sub>4</sub> solids were added. Concentration units for (Fe) and (Mg) are mg/L. All data reported here have a standard deviation (RSD) of ±10%.

| Time<br>(Days) | MgFeCO <sub>3</sub> |      |       | MgAlCO <sub>3</sub> |      |      | MgFeSO <sub>4</sub> |      |       | MgAlSO <sub>4</sub> |       |      |
|----------------|---------------------|------|-------|---------------------|------|------|---------------------|------|-------|---------------------|-------|------|
|                | Test 1              |      |       | Test 1              |      |      | Test 1              |      |       | Test 1              |       |      |
|                | pH                  | (Fe) | (Mg)  | pH                  | (Fe) | (Mg) | pH                  | (Fe) | (Mg)  | pH                  | (Fe)  | (Mg) |
| 0              | 5.5                 | 749  | 0     | 5.5                 | 749  | 0    | 5.5                 | 749  | 0     | 5.5                 | 749   | 0    |
| 1              | 7.8                 | 1.95 | 239.0 | 7.8                 | 20.0 | 50.4 | 8.7                 | 2.19 | 248.5 | 7.6                 | 330.1 | 46.3 |
| 2              | 8.9                 | 0.66 | 448.1 | 8.3                 | 0.65 | 64.2 | 8.7                 | 0.61 | 276.2 | 7.5                 | 299.3 | 49.9 |
| 4              | 8.9                 | 0.04 | 404.3 | 8.5                 | 0.43 | 60.5 | 9.0                 | 0.2  | 285.2 | 7.5                 | 184.4 | 61.4 |
| 7              | 8.8                 | 0.15 | 411.9 | 8.6                 | 0.5  | 51.5 | 9.0                 | 0.1  | 282.5 | 7.5                 | 131.3 | 47.5 |

| Time<br>(Days) | MgFeCO <sub>3</sub> |      |       | MgAlCO <sub>3</sub> |      |           | MgFeSO <sub>4</sub> |      |           | MgAlSO <sub>4</sub> |       |      |
|----------------|---------------------|------|-------|---------------------|------|-----------|---------------------|------|-----------|---------------------|-------|------|
|                | Test 2              |      |       | Test 2              |      |           | Test 2              |      |           | Test 2              |       |      |
|                | pH                  | (Fe) | (Mg)  | pH                  | (Fe) | (Mg)      | pH                  | (Fe) | (Mg)      | pH                  | (Fe)  | (Mg) |
| 0              | 5.5                 | 749  | 0     | 5.5                 | 749  | 0         | 5.5                 | 749  | 0         | 5.5                 | 749   | 0    |
| 1              | 8.2                 | 4.9  | 355.0 | 7.8                 | 21.2 | 65.1      | 7.7                 | 17.5 | 233.<br>2 | 7.8                 | 413.8 | 67.1 |
| 2              | 8.9                 | 0.12 | 259.4 | 8.5                 | 2.05 | 83.2<br>4 | 8.9                 | 0.71 | 348.<br>1 | 7.8                 | 322.3 | 63.6 |
| 4              | 8.9                 | 0.12 | 262.2 | 8.6                 | 0.74 | 85.4      | 8.9                 | 0.32 | 376.<br>4 | 7.5                 | 238.9 | 61.8 |
| 7              | 8.9                 | 0.17 | 274.9 | 8.6                 | 0.6  | 76.3      | 8.9                 | 0.16 | 372.<br>2 | 7.5                 | 149.9 | 46.3 |

Table S5. Leachability of Fe and Mg for individual tests conducted at pH 8 for 7 days with 0.5 mM Fe(II)<sub>(aq)</sub>. Time 0 days represents conditions before Mg(II)-Al(III)/Fe(III)-CO<sub>3</sub>/SO<sub>4</sub> solids were added. Concentration units for (Fe) and (Mg) are mg/L. All data reported here have a standard deviation (RSD) of ±10%.

| Time<br>(Days) | MgFeCO <sub>3</sub> |      |      | MgAlCO <sub>3</sub> |      |      | MgFeSO <sub>4</sub> |      |       | MgAlSO <sub>4</sub> |      |      |
|----------------|---------------------|------|------|---------------------|------|------|---------------------|------|-------|---------------------|------|------|
|                | Test 1              |      |      | Test 1              |      |      | Test 1              |      |       | Test 1              |      |      |
|                | pH                  | (Fe) | (Mg) | pH                  | (Fe) | (Mg) | pH                  | (Fe) | (Mg)  | pH                  | (Fe) | (Mg) |
| 0              | 5.5                 | 38   | 0    | 5.5                 | 38   | 0    | 5.5                 | 38   | 0     | 5.5                 | 38   | 0    |
| 1              | 9.0                 | 0.07 | 41.6 | 9.7                 | 0.07 | 1.08 | 9.4                 | 0.11 | 90.0  | 9.2                 | 0.09 | 5.05 |
| 2              | 9.0                 | 0.5  | 59.8 | 9.7                 | 1.95 | 1.87 | 9.2                 | 0.21 | 100.4 | 9.2                 | 0.05 | 5.48 |
| 4              | 9.1                 | 0.34 | 46.1 | 9.7                 | 0.14 | 0.79 | 9.0                 | 0.21 | 101.9 | 9.2                 | 0.06 | 3.99 |
| 7              | 9.1                 | 0.43 | 38.4 | 9.8                 | 0.09 | 0.66 | 9.9                 | 0.10 | 115.9 | 9.0                 | 0.50 | 2.30 |

| Time<br>(Days) | MgFeCO <sub>3</sub> |      |      | MgAlCO <sub>3</sub> |      |      | MgFeSO <sub>4</sub> |      |           | MgAlSO <sub>4</sub> |      |      |
|----------------|---------------------|------|------|---------------------|------|------|---------------------|------|-----------|---------------------|------|------|
|                | Test 2              |      |      | Test 2              |      |      | Test 2              |      |           | Test 2              |      |      |
|                | pH                  | (Fe) | (Mg) | pH                  | (Fe) | (Mg) | pH                  | (Fe) | (Mg)      | pH                  | (Fe) | (Mg) |
| 0              | 5.5                 | 38   | 0    | 5.5                 | 38   | 0    | 5.5                 | 38   | 0         | 5.5                 | 38   | 0    |
| 1              | 9.0                 | 0.11 | 56.7 | 9.7                 | 0.06 | 1.06 | 9.1                 | 0.14 | 84.8      | 9.0                 | 0.08 | 4.81 |
| 2              | 9.0                 | 0.17 | 46.8 | 9.7                 | 0.17 | 1.20 | 9.2                 | 0.13 | 92.3      | 9.2                 | 0.08 | 5.24 |
| 4              | 9.1                 | 0.1  | 43.8 | 9.8                 | 0.25 | 0.27 | 9.1                 | 0.04 | 94.4      | 9.1                 | 0.05 | 4.15 |
| 7              | 9.0                 | 0.10 | 19.0 | 9.7                 | 0.16 | 0.69 | 9.1                 | 0.21 | 100.<br>7 | 9.0                 | 0.17 | 4.55 |

Table S6. Leachability of Fe and Mg for individual tests conducted at pH 10 for 7 days with 0.5 mM Fe(II)<sub>(aq)</sub>. Time 0 days represents conditions Mg(II)-Al(III)/Fe(III)-CO<sub>3</sub>/SO<sub>4</sub> were added. Concentration units for (Fe) and (Mg) are mg/L. All data reported here have a standard deviation (RSD) of ±10%.

| Time<br>(Days) | MgFeCO <sub>3</sub> |      |      | MgAlCO <sub>3</sub> |      |      | MgFeSO <sub>4</sub> |      |      | MgAlSO <sub>4</sub> |      |      |
|----------------|---------------------|------|------|---------------------|------|------|---------------------|------|------|---------------------|------|------|
|                | Test 1              |      |      | Test 1              |      |      | Test 1              |      |      | Test 1              |      |      |
|                | pH                  | (Fe) | (Mg) |
| 0              | 5.5                 | 38   | 0    | 5.5                 | 38   | 0    | 5.5                 | 38   | 0    | 5.5                 | 38   | 0    |
| 1              | 9.2                 | 1.03 | 20.1 | 10.1                | 0    | 0.60 | 9.2                 | 0.10 | 53.1 | 9.8                 | 0.20 | 0.64 |
| 2              | 9.3                 | 0.07 | 10.4 | 9.9                 | 0.08 | 0.53 | 9.3                 | 0.10 | 69.4 | 10.1                | 0.1  | 0.40 |
| 4              | 9.7                 | 0.07 | 3.90 | 9.9                 | 0.13 | 0.43 | 9.4                 | 0.19 | 58.9 | 9.9                 | 0.18 | 0.34 |
| 7              | 9.7                 | 0.21 | 2.31 | 9.9                 | 0.15 | 0.46 | 9.4                 | 0.04 | 39.0 | 9.9                 | 0.30 | 0.57 |



| Time<br>(Days) | MgFeCO <sub>3</sub> |      |      | MgAlCO <sub>3</sub> |      |      | MgFeSO <sub>4</sub> |      |      | MgAlSO <sub>4</sub> |      |      |
|----------------|---------------------|------|------|---------------------|------|------|---------------------|------|------|---------------------|------|------|
|                | Test 2              |      |      | Test 2              |      |      | Test 2              |      |      | Test 2              |      |      |
|                | pH                  | (Fe) | (Mg) |
| 0              | 5.5                 | 38   | 0    | 5.5                 | 38   | 0    | 5.5                 | 38   | 0    | 5.5                 | 38   | 0    |
| 1              | 9.2                 | 0    | 17.4 | 9.9                 | 0.11 | 0.74 | 9.3                 | 0.2  | 53.9 | 9.7                 | 0.08 | 0.60 |
| 2              | 9.3                 | 0.07 | 9.70 | 9.9                 | 0    | 0.45 | 9.4                 | 0.09 | 64.8 | 10.<br>1            | 0.42 | 0.32 |
| 4              | 9.6                 | 0.14 | 5.35 | 10.<br>0            | 0.09 | 0.44 | 9.6                 | 0.16 | 45.8 | 10.<br>0            | 0.15 | 0.33 |
| 7              | 9.7                 | 0.16 | 3.60 | 9.9                 | 0.06 | 0.40 | 9.5                 | 0.07 | 38.7 | 9.9                 | 0.13 | 0.40 |

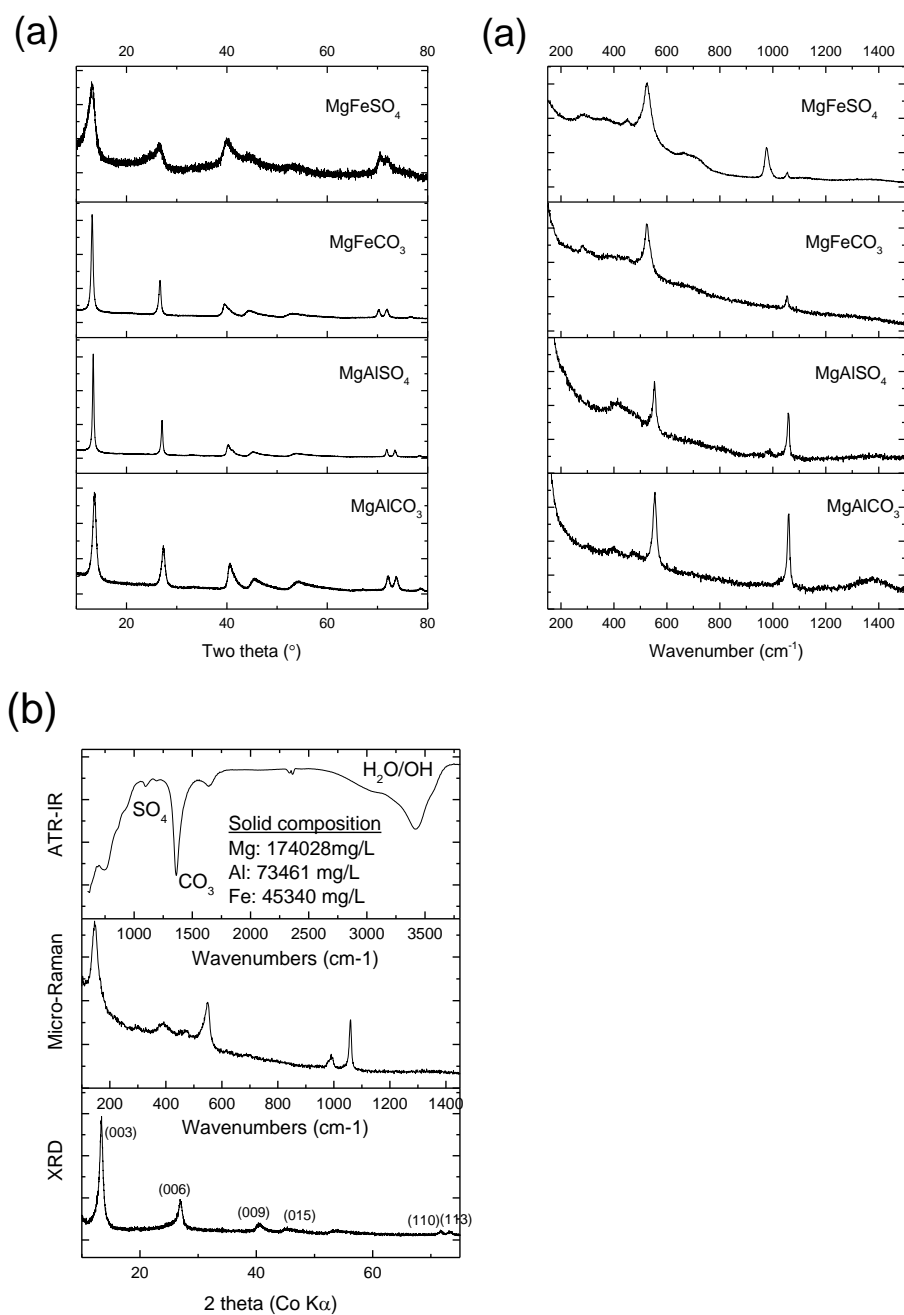

Figure S1. (a) XRD spectra (left) and micro-Raman spectra (right) of synthesized HTLC solid products before undergoing abiotic reduction. More detailed information on these starting materials can be found in our previous work.<sup>9</sup> (b) ATR-IR, micro-Raman, and XRD spectra of the Mg(II)-Al(III)-Fe(III) containing- $\text{SO}_4$ - $\text{CO}_3$  HTLC synthetic standard used in our work shows the typical HTLC structure from the described methods. The elemental composition of this Mg(II)-Al(III)-Fe(III) containing- $\text{SO}_4$ - $\text{CO}_3$  HTLC solid is also included.

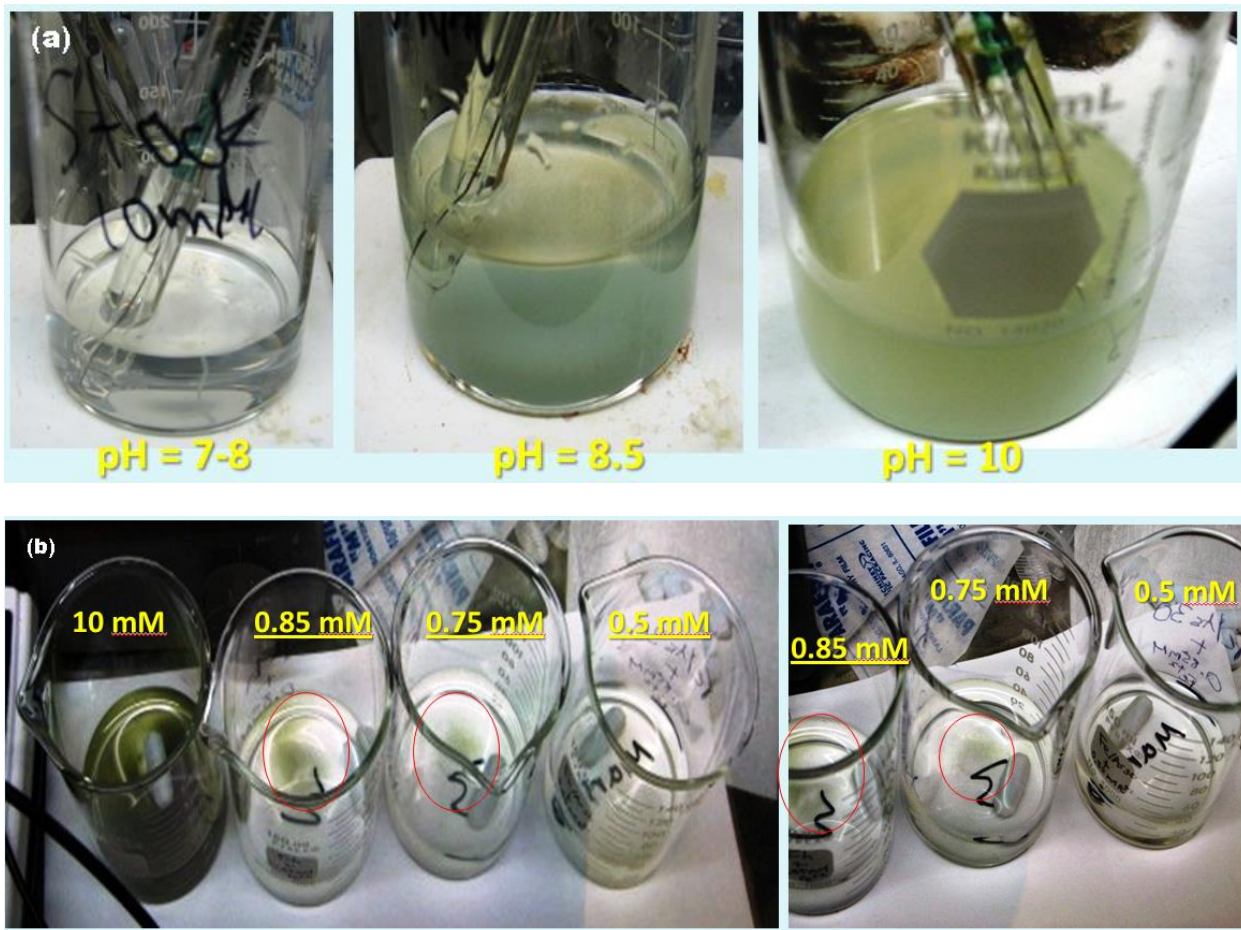

Figure S2. Precipitation of  $\text{Fe(II)}_{(\text{aq})}$  in solution at (a) pH 7-10 and a concentration of 10 mM and (b) pH 10 at concentrations ranging from 0.5 to 10 mM.

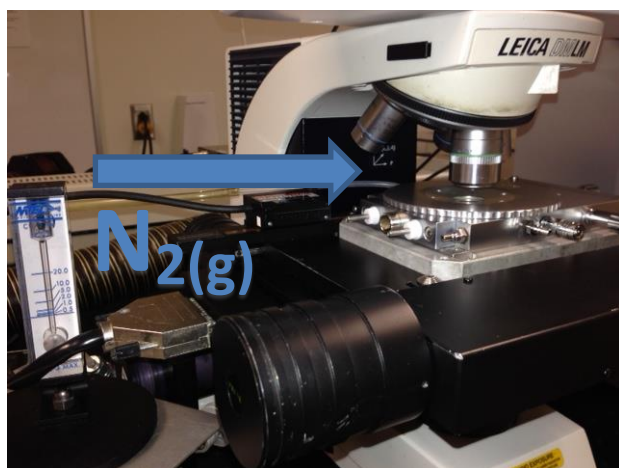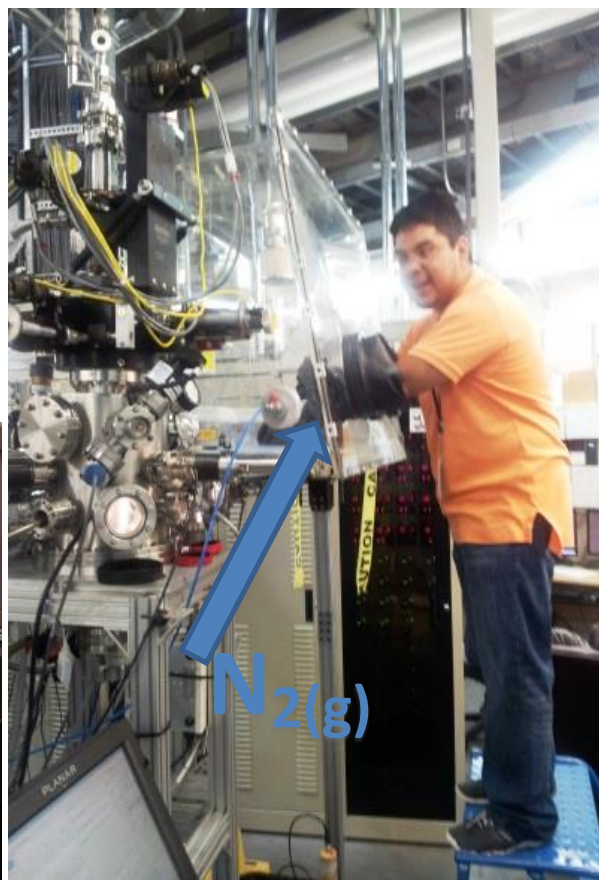

Fig S3. Inert (a) micro-Raman and (b) synchrotron based soft X-ray absorption spectroscopy experimental sample analysis set up.

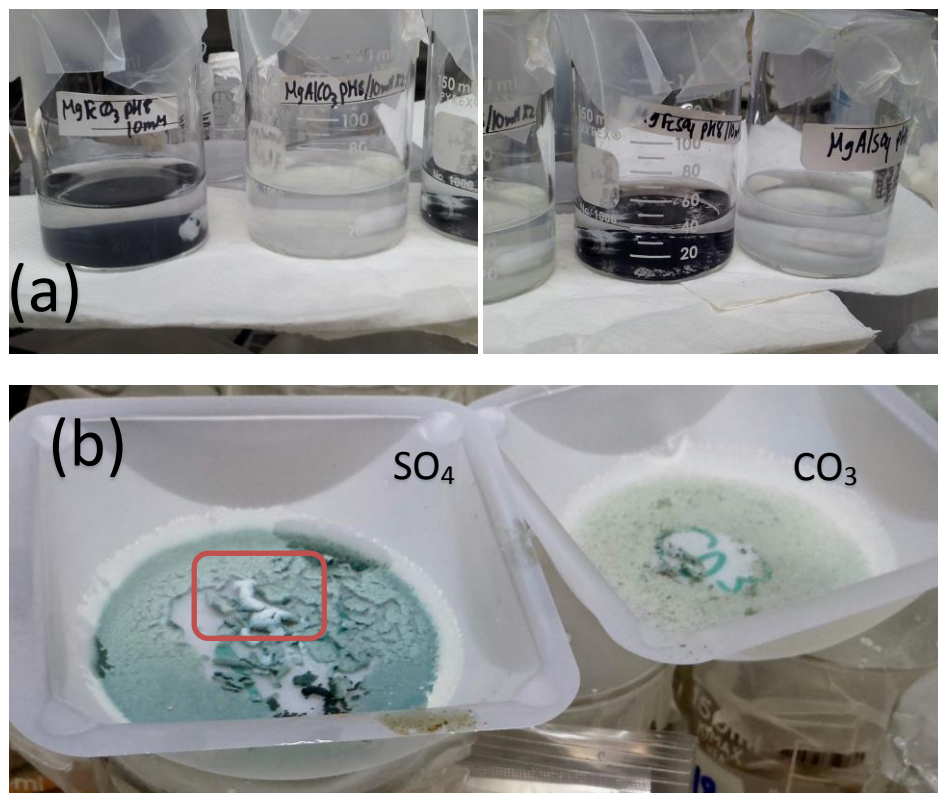

Fig S4. (a) Reacted Mg(II)-Al(III)/Fe(III)-CO<sub>3</sub>/SO<sub>4</sub> HTLCs at a target pH of 8 for 7 days and (b) reacted Mg-Al-CO<sub>3</sub>/SO<sub>4</sub> HTLCs at a target pH of 8 for 1 day with 10 mM Fe(II)<sub>(aq)</sub> compared to synthetic. The red box on the reacted Mg-Al-SO<sub>4</sub> HTLC shows a typical surface reaction precipitation.

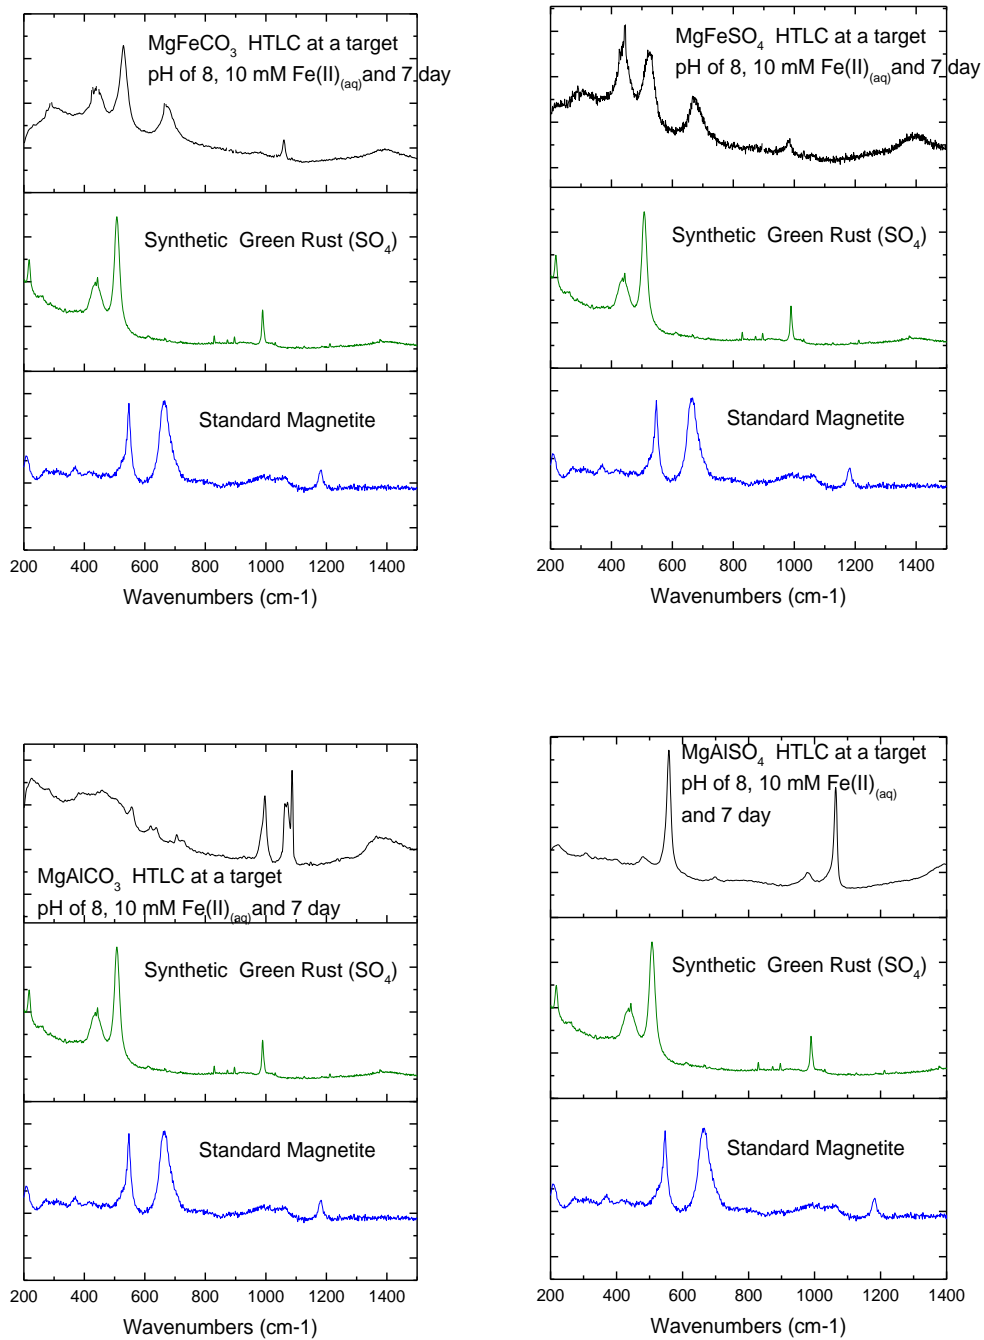

Fig S5. Inert micro-Raman spectra of the Mg(II)-Al(III)/Fe(III)-CO<sub>3</sub>/SO<sub>4</sub> sample reacted at a target pH of 8 for 7 days with 10 mM Fe(II)<sub>(aq)</sub> compared to the standard GR(SO<sub>4</sub>) and MG.

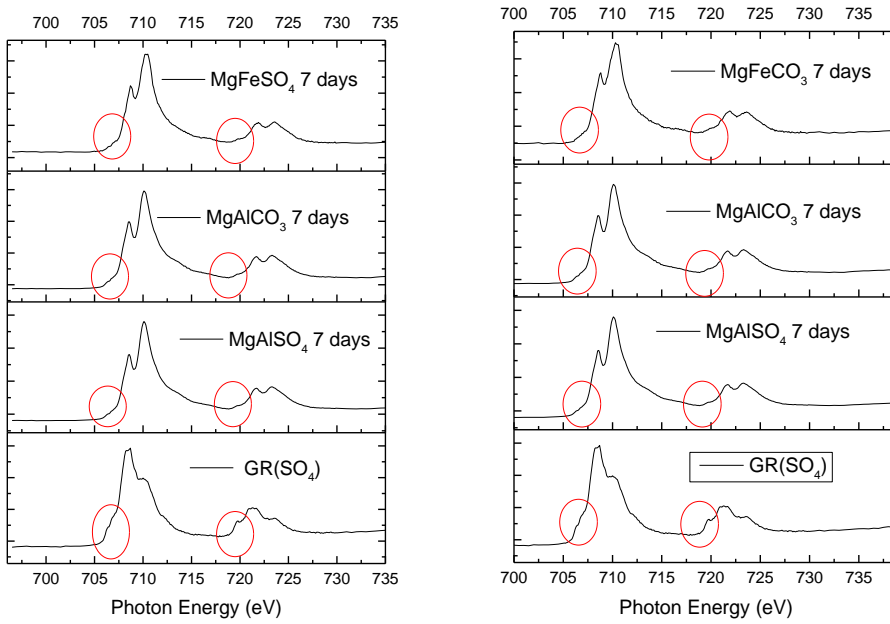

Fig S6. Fe L-edge TEY (surface) Mg(II)-Al(III)/Fe(III)-CO<sub>3</sub>/SO<sub>4</sub> HTLCs at a target pH of 8, 10mM Fe(II)<sub>(aq)</sub> for 7 days compared to standard GR. The red circles highlight the Fe(II) character of the spectra for the respective phases presented above. The energy scale presented in these spectra is relative.

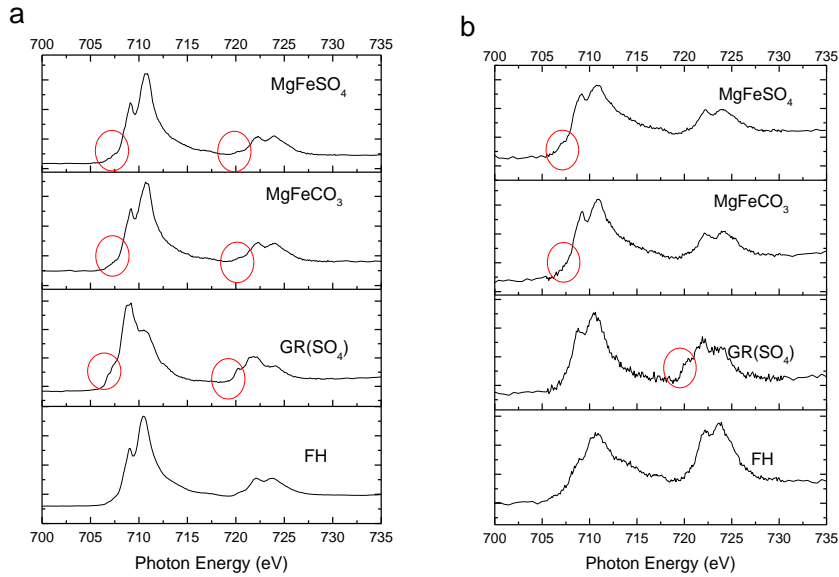

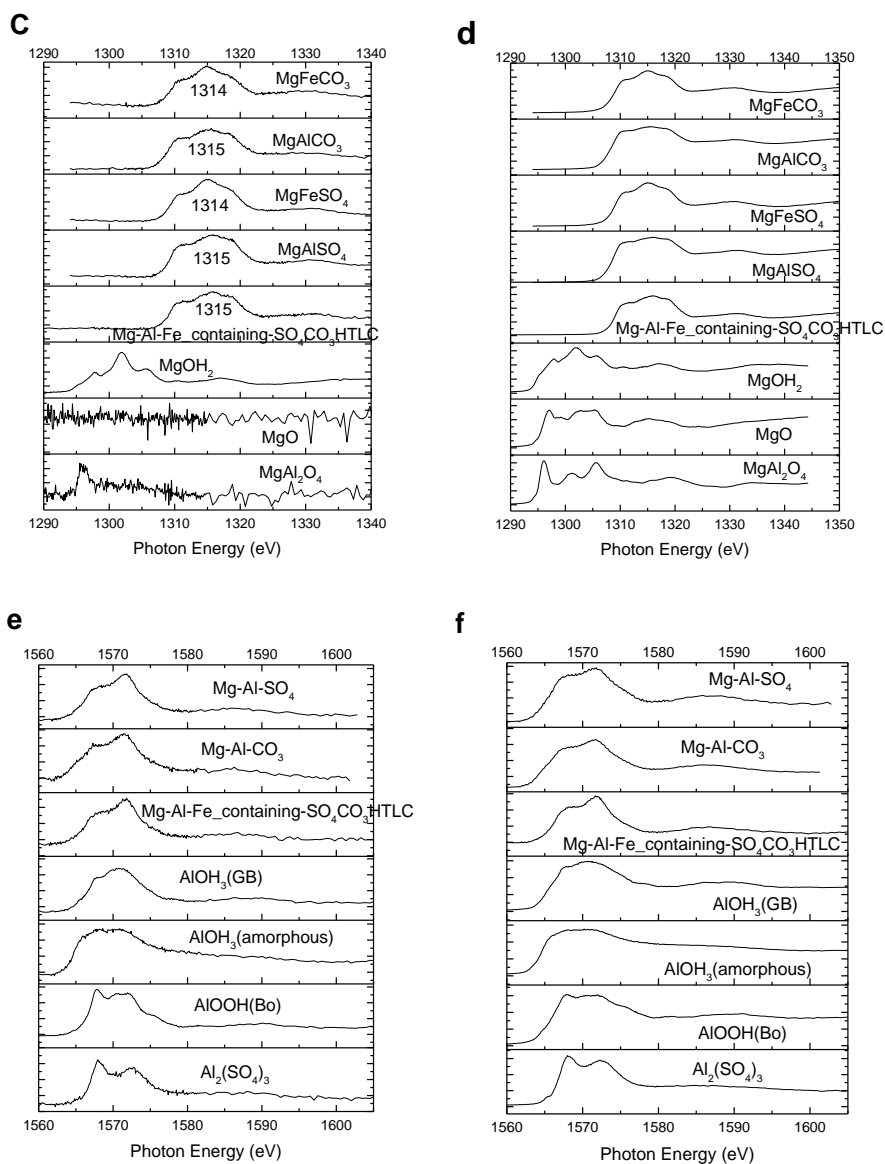

Fig S7. Energy calibrated Fe L-edge, Mg K-edge and Al K-edge TEY (surface: a, c and e) and PFY (bulk: b, d, f) spectra of reacted  $\text{Mg(II)-Al(III)/Fe(III)-CO}_3/\text{SO}_4$  HTLCs at a target pH of 8, 10mM  $\text{Fe(II)}_{(\text{aq})}$  for 7 days compared with relevant standards.
